# Supplementary material for: Evidence of Genomic Diversification in a Natural Symbiotic Population Within Its Host
Source: PubMed Central journal article supplement (PMC8922018; doi:10.3389/fmicb.2022.854355), 2022-03-01
Supplement: Table_1.pdf [file Table_1.pdf]

**Supplementary Table S1.** References for the *V. fischeri* strains isolated from the glycerol stock MB13B, containing an homogenate of the right-side central core of the light organ of squid MB13.

| Strain designation | Bioproject ID | Accession number |
|--------------------|---------------|------------------|
| MB13B101           | PRJNA796703   | SAMN24907221     |
| MB13B102           | PRJNA796703   | SAMN24907222     |
| MB13B103           | PRJNA796703   | SAMN24907223     |
| MB13B104           | PRJNA796703   | SAMN24907224     |
| MB13B105           | PRJNA796703   | SAMN24907225     |
| MB13B106           | PRJNA796703   | SAMN24907226     |
| MB13B107           | PRJNA796703   | SAMN24907227     |
| MB13B108           | PRJNA796703   | SAMN24907228     |
| MB13B109           | PRJNA796703   | SAMN24907229     |
| MB13B110           | PRJNA796703   | SAMN24907230     |
| MB13B111           | PRJNA796703   | SAMN24907231     |
| MB13B112           | PRJNA796703   | SAMN24907232     |
| MB13B113           | PRJNA796703   | SAMN24907233     |
| MB13B114           | PRJNA796703   | SAMN24907234     |
| MB13B115           | PRJNA796703   | SAMN24907235     |
| MB13B116           | PRJNA796703   | SAMN24907236     |
| MB13B117           | PRJNA796703   | SAMN24907237     |
| MB13B118           | PRJNA796703   | SAMN24907238     |
| MB13B119           | PRJNA796703   | SAMN24907239     |
| MB13B120           | PRJNA796703   | SAMN24907240     |
| MB13B121           | PRJNA796703   | SAMN24907241     |
| MB13B122           | PRJNA796703   | SAMN24907242     |
| MB13B123           | PRJNA796703   | SAMN24907243     |
| MB13B124           | PRJNA796703   | SAMN24907244     |
| MB13B125           | PRJNA796703   | SAMN24907245     |
| MB13B126           | PRJNA796703   | SAMN24907246     |
| MB13B127           | PRJNA796703   | SAMN24907247     |
| MB13B128           | PRJNA796703   | SAMN24907248     |
| MB13B129           | PRJNA796703   | SAMN24907249     |
| MB13B130           | PRJNA796703   | SAMN24907250     |
| MB13B131           | PRJNA796703   | SAMN24907251     |
| MB13B132           | PRJNA796703   | SAMN24907252     |
| MB13B133           | PRJNA796703   | SAMN24907253     |
| MB13B134           | PRJNA796703   | SAMN24907254     |
| MB13B135           | PRJNA796703   | SAMN24907255     |
| MB13B136           | PRJNA796703   | SAMN24907256     |
| MB13B137           | PRJNA796703   | SAMN24907257     |
| MB13B138           | PRJNA796703   | SAMN24907258     |
| MB13B139           | PRJNA796703   | SAMN24907259     |
| MB13B140           | PRJNA796703   | SAMN24907260     |
| MB13B141           | PRJNA796703   | SAMN24907261     |
| MB13B142           | PRJNA796703   | SAMN24907262     |
| MB13B143           | PRJNA796703   | SAMN24907263     |

|          |             |              |
|----------|-------------|--------------|
| MB13B144 | PRJNA796703 | SAMN24907264 |
| MB13B145 | PRJNA796703 | SAMN24907265 |
| MB13B146 | PRJNA796703 | SAMN24907266 |
| MB13B147 | PRJNA796703 | SAMN24907267 |
| MB13B148 | PRJNA796703 | SAMN24907268 |
| MB13B149 | PRJNA796703 | SAMN24907269 |
| MB13B150 | PRJNA796703 | SAMN24907270 |
| MB13B151 | PRJNA796703 | SAMN24907271 |
| MB13B152 | PRJNA796703 | SAMN24907272 |
| MB13B153 | PRJNA796703 | SAMN24907273 |
| MB13B154 | PRJNA796703 | SAMN24907274 |
| MB13B155 | PRJNA796703 | SAMN24907275 |
| MB13B156 | PRJNA796703 | SAMN24907276 |
| MB13B157 | PRJNA796703 | SAMN24907277 |
| MB13B158 | PRJNA796703 | SAMN24907278 |
| MB13B159 | PRJNA796703 | SAMN24907279 |
| MB13B160 | PRJNA796703 | SAMN24907280 |
| MB13B161 | PRJNA796703 | SAMN24907281 |
| MB13B162 | PRJNA796703 | SAMN24907282 |
| MB13B163 | PRJNA796703 | SAMN24907283 |
| MB13B164 | PRJNA796703 | SAMN24907284 |
| MB13B165 | PRJNA796703 | SAMN24907285 |
| MB13B166 | PRJNA796703 | SAMN24907286 |
| MB13B167 | PRJNA796703 | SAMN24907287 |
| MB13B168 | PRJNA796703 | SAMN24907288 |
| MB13B169 | PRJNA796703 | SAMN24907289 |
| MB13B170 | PRJNA796703 | SAMN24907290 |
| MB13B171 | PRJNA796703 | SAMN24907291 |
| MB13B172 | PRJNA796703 | SAMN24907292 |
| MB13B173 | PRJNA796703 | SAMN24907293 |
| MB13B174 | PRJNA796703 | SAMN24907294 |
| MB13B175 | PRJNA796703 | SAMN24907295 |
| MB13B176 | PRJNA796703 | SAMN24907296 |
| MB13B177 | PRJNA796703 | SAMN24907297 |
| MB13B178 | PRJNA796703 | SAMN24907298 |
| MB13B179 | PRJNA796703 | SAMN24907299 |
| MB13B180 | PRJNA796703 | SAMN24907300 |
